# Supplementary material
Source: PubMed Central journal article supplement (PMC4605461)
Supplement: CJHP-68-378-s001.pdf [file CJHP-68-378-s001.pdf]

## Appendix 1. Survey of Canadian pharmacists' perceptions of the effects of drug promotion (part 1 of 2)

1. Drug samples are an appropriate method of providing medications to patients who cannot afford them.  
 Disagree  Somewhat disagree  I don't know  
 Somewhat agree  Agree
2. Drug samples are an appropriate method to trial a medication.  
 Disagree  Somewhat disagree  I don't know  
 Somewhat agree  Agree
3. What % of sales revenue do pharmaceutical companies spend of their promotion dollars on drug samples?  
 I don't know  <10%  10–20%  20–30%  
 30–50%  >50%
4. Have you ever accepted meals or attended CME lunch/dinner events that were sponsored by pharmaceutical companies?  
 Yes  No
5. The information provided at those events has an influence on my practice and how I make drug recommendations.  
 Disagree  Somewhat disagree  I don't know  
 Somewhat agree  Agree
6. The information provided at those events influences other pharmacists' practice and how they make drug recommendations.  
 Disagree  Somewhat disagree  I don't know  
 Somewhat agree  Agree
7. Information provided at pharmaceutical company-sponsored events is balanced.  
 Disagree  Somewhat disagree  I don't know  
 Somewhat agree  Agree
8. Attending CMEs organized and sponsored by pharmaceutical companies (e.g. drug lunches, guest speaker at a local restaurant) are a perceived or actual conflict of interest.  
 Disagree  Somewhat disagree  I don't know  
 Somewhat agree  Agree
9. Attending CMEs organized by a professional organization (e.g. CSHP Spring therapeutics update) and sponsored by pharmaceutical companies through unrestricted grants are a perceived or actual conflict of interest.  
 Disagree  Somewhat disagree  I don't know  
 Somewhat agree  Agree
10. Have you ever received gifts from pharmaceutical companies?  
 Yes  No
10. If yes, were the gifts:  
 Small (e.g. pens, notepads, cups)  
 Large (e.g. trips, tickets to events, golf)
12. Does the receipt of an honorarium by the speaker from a company affect your perception of the message provided by the speaker?  
 Disagree  Somewhat disagree  I don't know  
 Somewhat agree  Agree
13. I believe that accepting small gifts from pharmaceutical companies influences my practice and how I make drug recommendations.  
 Disagree  Somewhat disagree  I don't know  
 Somewhat agree  Agree
14. I believe that accepting small gifts from pharmaceutical companies influences other pharmacists' practice and how they make drug recommendations.  
 Disagree  Somewhat disagree  I don't know  
 Somewhat agree  Agree
15. Accepting large gifts from pharmaceutical companies influences my practice and how I make drug recommendations.  
 Disagree  Somewhat disagree  I don't know  
 Somewhat agree  Agree
16. Accepting large gifts from pharmaceutical companies influences other pharmacists' practice and how they make drug recommendations.  
 Disagree  Somewhat disagree  I don't know  
 Somewhat agree  Agree
17. Accepting small gifts from pharmaceutical companies is a perceived or actual conflict of interest.  
 Disagree  Somewhat disagree  I don't know  
 Somewhat agree  Agree
18. Accepting large gifts from pharmaceutical companies is a perceived or actual conflict of interest.  
 Disagree  Somewhat disagree  I don't know  
 Somewhat agree  Agree
19. Drug advertisements influence my practice and how I make drug recommendations.  
 Disagree  Somewhat disagree  I don't know  
 Somewhat agree  Agree
20. Drug advertisements influence other pharmacists' practice and how they make drug recommendations.  
 Disagree  Somewhat disagree  I don't know  
 Somewhat agree  Agree
21. Pharmaceutical company funding of academic institutions (e.g. UBC Pharmacy School student lounge renovation or research lab) is a perceived or actual conflict of interest.  
 Disagree  Somewhat disagree  I don't know  
 Somewhat agree  Agree

continued on page E10

Supplementary material for Tejani AM, Loewen P, Bachand R, Harder CK. Pharmacists' perceptions of the influence of interactions with the pharmaceutical industry on clinical decision-making. *Can J Hosp Pharm.* 2015;68(5):378-85.

## Appendix 1. Survey of Canadian pharmacists' perceptions of the effects of drug promotion (part 2 of 2)

22. How much would you pay to attend a non-pharmaceutical industry sponsored event with a credible speaker plus/minus a modest meal?  
 Approximately \$25     Approximately \$25–\$50  
 Approximately \$50–\$100     I would not attend
23. What percentage of sales revenue do you believe pharmaceutical companies spend on drug promotion?  
 I don't know     <10%     10–20%  
 20–30%     30–50%     >50%
24. My relationship to the industry promotes my professionalism and helps me care for my patients.  
 Disagree     Somewhat disagree     I don't know  
 Somewhat agree     Agree
25. A perceived or actual conflict of interest exists when hospitals secure favourable drug pricing from a pharmaceutical company (e.g. financial rebates, nearly-free drugs) in order for the company to increase its market share among outpatients.  
 Disagree     Somewhat disagree     I don't know  
 Somewhat agree     Agree
26. Do you meet with sales representatives (i.e. drug reps) from pharmaceutical companies?  
 Yes     No
27. A pharmacist that receives a financial award, where the money was provided by a pharmaceutical company, is in a perceived or actual conflict of interest.  
 Disagree     Somewhat disagree     I don't know  
 Somewhat agree     Agree
28. How many years have you been a practicing pharmacist?  
 0–5 years     6–10 years     >11 years
29. Which of the following best describes your practice?  
 Administrator/supervisor  
 Pharmacist with primarily drug distribution responsibilities (less than 20% clinical)  
 Pharmacist with drug distribution and clinical responsibilities  
 Pharmacist with primarily clinical responsibilities (less than 20% drug distribution)  
 Pharmacist with only clinical responsibilities (patient care/teaching/etc.)
30. Which of the following best describes your practice site?  
 Tertiary acute care facility  
 Community facility with acute and residential care  
 Residential care facility  
 Community care practice
31. What is your highest level of education?  
 Bachelor's  
 Hospital Pharmacy Residency (now called pharmacy practice residency)  
 PharmD, Master's, PhD
32. Last year, how many industry-organized educational events did you attend?  
 0–5     6–10     11–15     >15
33. How much of your time is spent doing direct patient care?  
 0%     1–20%     21–50%     >50%
